1 **Mis-annotated multi nucleotide variants in public cancer genomics datasets**  
2 **can lead to inaccurate mutation calls with significant implications**

3

4 Sujaya Srinivasan<sup>1†</sup>, Natallia Kalinava<sup>1†</sup>, Rafael Aldana<sup>2</sup>, Zhipan Li<sup>2</sup>, Sjoerd van Hagen<sup>3</sup>,  
5 Sander Y.A. Rodenburg<sup>3</sup>, Megan Wind-Rotolo<sup>4</sup>, Ariella S. Sasson<sup>1</sup>, Hao Tang<sup>1</sup>, Xiaozhong Qian  
6 <sup>4</sup>, Stefan Kirov<sup>1\*</sup>

7 <sup>1</sup> Informatics & Predictive Sciences, Bristol Myers Squibb, Princeton, NJ 08648 USA

8 <sup>2</sup> Sentieon Inc, Mountain View, CA, USA.

9 <sup>3</sup> The Hyve, Arthur van Schendelstraat 650, 3511 MJ Utrecht, The Netherlands.

10 <sup>4</sup> Translational Medicine, Bristol Myers Squibb, Princeton, NJ 08648 USA

11 <sup>5</sup> Translational Sciences, Daichi Sankyo, Basking Ridge NJ, USA

12 <sup>†</sup> These authors contributed equally to this work

13 \* Corresponding author: Stefan Kirov, [stefan.kirov@bms.com](mailto:stefan.kirov@bms.com)

14

15 **Abstract**

16 **Background**

17 Next generation sequencing is widely used in cancer to profile tumors and detect  
18 variants. Most somatic variant callers used in these pipelines identify variants at the lowest  
19 possible granularity – single nucleotide variants (SNVs). As a result, multiple adjacent SNVs  
20 are called individually instead of as a multi-nucleotide variant (MNV). The problem with this  
21 level of granularity is that the amino acid change from the individual SNVs within a codon  
22 could be different from the amino acid change based on the MNV that results from  
23 combining the SNVs. Most variant annotation tools do not account for this, leading to  
24 incorrect conclusions about the downstream effects of the variants.

25 **Method**

26 Here, we used Variant Call Files (VCFs) from the TCGA Mutect2 caller, and developed a  
27 solution to merge SNVs to MNVs. Our custom script takes the phasing information from the  
28 SNV VCFs and based on a gene model, determines if SNVs are at the same codon and need  
29 to be merged into a MNV prior to variant annotation.

30 **Results**

31 We analyzed 10,383 VCFs from TCGA and found 12,141 MNVs that were incorrectly  
32 annotated. Strikingly, the analysis of seven commonly mutated genes from 178 studies from  
33 cBioPortal revealed that MNVs were consistently missed in 20 of these studies, while they  
34 were correctly annotated in 15 more recent studies. The best and most common example of  
35 MNVs was found at the BRAF V600 locus, where several public datasets reported separate  
36 BRAF V600E and BRAF V600M variants, instead of a single merged V600K variant.

37 **Conclusion**

38 While some datasets merged MNVs correctly, many public datasets have not been  
39 corrected for this problem. As a best practice for variant calling, we recommend that MNVs  
40 be accounted for in NGS processing pipelines, thus improving analyses on the impact of  
41 somatic variants in cancer genomics.

42

## 43 **Background**

44 Next generation sequencing is commonly used in cancer to determine the underlying  
45 genomic features of the tumor<sup>1</sup>. Pipelines that convert the raw sequencing data into useful  
46 knowledge include sequence alignment, variant calling and annotation tools. Single  
47 nucleotide variants and indels are the most common type of variants called by most variant  
48 callers, and these variants are prevalent in many important cancer genes. Most popular  
49 variant callers like Mutect2<sup>2</sup>, VarScan2<sup>3</sup>, VarDict<sup>4</sup>, strelka2<sup>5</sup> and the Sentieon<sup>6</sup> suite of tools  
50 call variants at the most granular level of single nucleotide variants (SNVs) and indels.  
51 Missense and nonsense variants produce amino acid changes that could result in a protein  
52 that is either non-functional, or has a different or impaired function. Accurate annotation, of  
53 the amino acid changes that occur due to the SNVs and indels, is therefore critical to  
54 understanding the functional consequences of these variants.

55 A multi-nucleotide variant (MNV) is defined as two or more variants within the same  
56 codon on the same haplotype (see Figure 1). Variant callers commonly detect SNVs and  
57 small indels, but most callers and downstream variant annotation tools fail to consider  
58 whether nearby variants are part of the same haplotype. If multiple nearby variants happen  
59 to be within a single codon, the amino acid change could be different from the individual  
60 amino acid changes resulting from the SNVs. Many variant callers, such as Strelka, VarScan

61 and VarDict, do not include haplotype or phase information with the variant calls. Some of  
62 the more recent variant callers such as Mutect2, Sentieon TNScope and Sentieon  
63 TNHaplotyper include phase information to indicate if nearby variants are in phase (i.e. part  
64 of the same haplotype) when there is enough evidence from the reads supporting the  
65 variants.

66 Commonly used variant annotation tools, such as SnpEff<sup>7</sup>, ANNOVAR<sup>8</sup>, & Ensembl  
67 Variant Effect Predictor (VEP)<sup>9</sup>, annotate variants individually without considering haplotype  
68 information or combining nearby in-phase variants to MNVs. There are some tools such as  
69 bcftools csq<sup>10</sup> (haplotype aware consequence caller) that have tried to address this problem,  
70 but the software expects phased VCFs as input with phasing information in the genotype  
71 (GT) field in a specific and seldom used format. MAC<sup>11</sup>(Multi-nucleotide Variant Annotation  
72 Corrector) requires both the VCF and the corresponding Binary Alignment Map (BAM) file in  
73 order to correct for MNVs, corresponding to adjacent SNVs. MACARON (Multi-bAse Codon  
74 Association variant ReannotatiON)<sup>12</sup> is another tool that uses both the VCF and the BAM to  
75 re-annotate VCFs with corrected MNVs from multiple SNVs within a codon.

76 There are several important cancer genes that are known to have hotspot regions with  
77 many variants. A few examples are BRAF at the V600 locus, and KRAS at G12 and G13 loci.  
78 Sometimes these variants are part of the same haplotype, and therefore should be  
79 annotated as MNVs, but most pipelines annotate them as multiple SNVs. This could lead to  
80 incorrect functional predictions for the effect of the variants.

81 In this paper, we consider some common public cancer genomics datasets to  
82 understand if MNVs are accounted for, and propose a method to merge SNVs into MNVs.

83

## 84 **Results**

### 85 **TCGA results**

86 We downloaded 10,383 Mutect2 VCF files processed with the human reference genome  
87 (GRCh38) from The Cancer Genome Atlas (TCGA). The downloaded VCFs comprise 33 cancer  
88 types or indications.

89 We post-processed the TCGA mutect2 VCFs using a custom developed MNV merge  
90 script. This script takes the SNVs that are in phase and within the same codon and merges  
91 them into MNV. We excluded repeat regions and major histocompatibility complex (MHC)  
92 regions for this analysis, and only characterized the instances of merged SNVs. Indels were  
93 not considered at this time. We found that across all files, there were a total of 12,141  
94 MNVs that were originally annotated as multiple SNVs, and of these 6,357 had a completely  
95 novel protein effect, i.e the new protein effect was different from the SNVs' protein effects  
96 (Table 1, Fig. 2). The most frequent novel MNV events were new missense events (5,413).  
97 Nonsense events, both stop gain (254) and rescue of nonsense (517), had the most impact  
98 on the interpretation of protein function. This shows that annotating MNVs correctly can  
99 significantly alter downstream analysis results.

100 Skin Cutaneous Melanoma (SKCM) and lung cancers: lung adenocarcinoma (LUAD) and  
101 lung squamous cell carcinoma (LUSC) had the highest percentage of samples with MNVs  
102 (Fig. 3a). We also found the highest median number of SNVs and MNVs in SKCM, LUAD and  
103 LUSC (Fig. 3b and c). This is expected because of the high Tumor Mutation Burden (TMB) in  
104 these indications. Breast cancer (BRCA), the indication with the largest number of samples  
105 in this dataset (1,040 samples), is known to have a low TMB<sup>13</sup>, and our results are consistent  
106 with this.

107 While most genes had only one or two MNVs, we found 22 genes that had 10 or more  
108 MNVs (Fig. 3d). Many of these genes are known for hotspot mutations, so this finding is not  
109 that surprising. The most consistent MNVs were in the BRAF gene: 43 out of 46 MNVs were  
110 at the V600 locus, all with a novel missense outcome. Furthermore, a single BRAF V600M  
111 never occurred alone, but always co-occurred in phase with another variant V600G or  
112 V600E, leading to the novel mutations V600R and V600K respectively.

113

#### 114 **cBioPortal results**

115 We analyzed mutation annotation files (MAF) from cBioPortal<sup>14,15</sup>  
116 (<http://www.cbioportal.org>) from all non-redundant studies (178) for 7 cancer genes (BRAF,  
117 KRAS, NRAS, PTEN, BRCA1, BRCA2, MUC16). Since cBioPortal MAFs do not have phasing  
118 information, we used counts for the variant reads and variant allele frequencies, as proxies  
119 for phase. If the variant allele frequencies of two variants within a codon was approximately  
120 the same, we inferred that they co-occurred on the same read (Fig. 4).

121 Some common hotspot regions of cancer genes, like BRAF V600 and KRAS G12 loci, were  
122 particularly affected by not merging the SNVs into MNVs. While some studies did call the  
123 MNVs correctly, there were 20 studies, including several TCGA studies, that did not. Table 1  
124 shows the most common mis-annotated MNVs among the seven genes that we studied. The  
125 most frequently mis-annotated MNV was at the BRAF V600 locus, with a total of 61 MNVs  
126 (V600K and V600R). The KRAS G12 locus had 14 MNVs with the most common being co-  
127 occurring G12V and G12C SNVs which should have been annotated as G12F.

128 In our analysis of all BRAF V600 variants from cBioPortal, we found only two occurrences  
129 of V600M alone, with no other variant. Since we did not have the full set of variant calls

130 from this dataset, it was not possible for us to determine if these two occurrences were  
131 actually V600M, or if they co-occurred with another variant that was filtered out for quality  
132 reasons, or due to the fact that it was a synonymous variant. There were 64 other samples  
133 that had a BRAF V600M variant, but those samples also had either a V600G or V600E variant  
134 (Supplementary Table 1). When we examined all studies, including duplicate samples from  
135 studies that were submitted at different times, we found that there were conflicting entries  
136 for some samples. The SNVs from the earlier submissions were replaced by MNVs in later  
137 submissions, indicating that pipelines had probably been updated to correct for MNVs.  
138 Some examples of these are the corrections for the KRAS G12 variants and the BRAF V600  
139 variants (Supplementary table 1). One important example of a corrected MNV was a V600D,  
140 which consists of a synonymous variant along with a V600E. These variants would be  
141 completely missed in our analysis from cBioPortal, since synonymous variants are filtered  
142 out. They would only appear if MNVs were correctly handled.

143

#### 144 **Double base mutation patterns**

145 Somatic variants in cancer genomes have specific patterns, known as Mutational  
146 Signatures<sup>16</sup> associated with underlying processes that characterize the specific etiology of  
147 the cancer. The Doublet Base Substitution (DBS) Signatures published in Mutational  
148 Signatures v3<sup>17</sup> show the two base-pair signatures that are characteristic of certain cancer  
149 types.

150 We analyzed the TCGA data after it had been corrected for MNVs, and identified the  
151 most common double-base mutation patterns in Fig. 5a. We found that the CC to TT change  
152 was prominent in melanoma samples (Fig. 5b). This is consistent with the reported

153 signature, DBS 1, which is a characteristic of UV related damage. Lung cancer (LUAD and  
154 LUSC) samples predominantly showed CC to AA change (Fig. 5b), which was consistent with  
155 the DBS 2 signature, indicating exposure to tobacco smoking<sup>17</sup>. This shows that the detected  
156 MNVs are consistent with the expected mutational signatures, and by analyzing MNVs, we  
157 can detect underlying patterns that would be missed otherwise.

158

## 159 **Discussion**

160 We analyzed VCFs from TCGA as well as MAF files from cBioPortal, and found that there  
161 were over 12,000 MNVs that were characterized as SNVs in TCGA. Many of these MNVs are  
162 in important cancer genes, such as BRAF and KRAS. From a functional perspective, it is  
163 important to annotate these variants correctly, so that the effects of the variants can be  
164 properly evaluated and interpreted. For example, we did not find a single occurrence of a  
165 BRAF V600M alone in any of the studies, it was always in phase with a V600E or V600G.

166 At the same time a number of publications reference V600M<sup>18-28</sup>; COSMIC database at  
167 the time we reviewed the data lists 31 occurrences of V600M. The methods for detecting  
168 the mutation are extremely diverse, ranging from Restriction Fragment Length  
169 Polymorphism(RFLP) and direct Sanger sequencing to MassArray/Sequenom platform. We  
170 cannot evaluate to what extent these methods have the ability to detect MNVs as this is  
171 beyond the scope of this study, but it likely these errors are more broadly occurring.

172 Other studies identified double V600M-V600E or V600M-V600G mutants that are  
173 possibly MNVs, as the detection method does not allow for phasing information to be  
174 known (typically Sanger sequencing)<sup>29,30</sup>. In this specific case, the correct identification of  
175 the amino acid change may have serious consequences. A number of BRAF inhibitors are



176 approved for either V600E or V600E/K<sup>31,32</sup>, but treatment options may differ for other rare  
177 mutations, including V600M. For example, there is preclinical data suggesting that BRAF  
178 kinase activity may not be altered in V600M/A unlike V600E/K/D<sup>33</sup>. Retrospective analysis  
179 points to V600K carriers having a worse prognosis<sup>34</sup> and worse PFS response to existing  
180 BRAF inhibitors<sup>35</sup>.

181 From a cancer biology perspective, it is also curious to understand how these MNVs  
182 evolve. The V600K/R for example are not driven by UV damage as V600K originates from  
183 GT->AA and V600R originates from GT->AG, whereas UV signature is associated with C->T  
184 events<sup>36</sup>. Studies on germ-line MNVs have shown that this type of events tends to be more  
185 pathological than SNVs and associated mostly with APOBEC and DNA polymerase zeta<sup>37</sup>.  
186 Another potential mechanism would argue that two independent SNVs happen to occur by  
187 chance in the same codon, and that the resulting MNV clone gains an advantage and  
188 eventually displaces the original SNV clone from the tumor population. However, we should  
189 be able to at least occasionally detect the founding clone mutation in the same tumor  
190 specimen, evidence of which we have not seen to date.

191 There have been many large-scale efforts to characterize MNVs within a germline  
192 context, most recently with gnomAD<sup>38</sup>. However, one of the potential issues we did not  
193 address in this paper is when germline variants are part of the same haplotype with a  
194 proximal somatic variant as part of the same codon. There is not much evidence that this is  
195 a widespread problem<sup>39</sup>, but it would be important to assess the effect of it.

196 In our analysis of the various cBioPortal studies, we observed that several studies after  
197 2017 from larger academic hospitals and institutions had corrected for MNVs, indicating  
198 that the problem was recognized and fixed in some of these pipelines. We also found that

199 the ICGC PCAWG<sup>40</sup> effort and the AACR Genie<sup>41</sup> project called MNVs correctly. However,  
200 there are still several smaller academic and commercial labs that may not have fixed this  
201 issue, and our analysis shows the need for the MNV merge step to be incorporated into  
202 variant-calling pipelines as a standard best practice. Needless to say, clinical assays should  
203 be assessed not only on the correct characterization of BRAF V600 mutants, but also the  
204 precise amino acid change associated with it.

205

## 206 **Methods**

### 207 **MNV Merging for TCGA VCFs**

208 We downloaded 10,383 TCGA VCFs processed using the Mutect2 variant caller on the  
209 GRCh38 reference genome from the Cancer Genomics cloud. When nearby variants are part  
210 of the same haplotype (in phase), Mutect2 adds tags to indicate this – PGT is the phased  
211 genotype of the variant, and PID is an ID that is shared between variants of the same  
212 haplotype; this information is then used by a python script to merge SNVs to MNVs.

213 We downloaded Refseq transcripts BED file from the UCSC table browser  
214 (<https://genome.ucsc.edu>) and pre-processed it into a codon file that had the positions of  
215 each codon defined. The MNV merge script then used this codon file to determine whether  
216 to merge SNVs, based on whether they are part of the same haplotype and codon.

217 The python script (merge\_mnp.py) takes the input VCF, reference genome, pre-  
218 processed codons text file and a parameter that specifies if indels should be considered. For  
219 the purposes of this study, we did not consider indels. The python script identifies SNVs that  
220 are both in phase and within the same codon into a new MNV. The new MNV has a PASS in  
221 the filter field, while the original SNVs have a MERGED in the filter field to represent that

222 they have been superseded by the MNV. All code can be found on GitHub at

223 <https://github.com/Sentieon/sentieon-scripts>.

224 The VCFs that have the merged MNVs were annotated using SnpEff. Annotations from  
225 gnomAD v2.1.1<sup>42</sup>, dbSNP<sup>43</sup> version 146 and COSMIC<sup>44</sup> version 84 were added to the VCFs,  
226 and both “PASS” and “MERGED” variants were retained in order to be able to trace the  
227 MNVs and the original SNVs. The repeat masker GRCh38 annotations were used to mask the  
228 repetitive regions and were excluded from the MNV analysis. The highly variable MHC  
229 region at chromosome 6 position 28510120 - 33480578 was also excluded from the MNV  
230 analysis.

### 231 **cBioPortal**

232 We downloaded Mutation Annotation Files (MAF) from the cBioPortal  
233 (<https://www.cbioportal.org/>) by choosing “Curated list of non-redundant studies” for 7  
234 genes – BRAF, KRAS, NRAS, PTEN, BRCA1, BRCA2, MUC16. To identify variants that were  
235 part of the same haplotype and at the same codon position, we looked for those instances  
236 where there were multiple variants from the same sample at the same codon position, and  
237 had the same Variant Allele Frequency (VAF). This indicated that it was highly likely that the  
238 variants appeared together on most reads

239 In addition, we queried the public cBioPortal API (<https://www.cbioportal.org/api/>),  
240 retrieving the complete collection of mutation data for all loaded studies. We then filtered  
241 mutations for few selected mutation hotspots, i.e. BRAF V600, KRAS G12, and NRAS Q61,  
242 and subsequently determined which variant calls occurred in each sample at these hotspots.  
243 Samples occurring in multiple studies were combined, but we kept track of the cases where  
244 samples had different variant calls between studies.

245

246 **Declarations**

247 **Ethics approval and consent to participate**

248 Not applicable

249

250 **Consent for Publication**

251 Not applicable

252

253 **Availability of data and materials**

254 TCGA data is available from the Genomic Data commons at

255 <https://portal.gdc.cancer.gov/>. Data from cBioPortal is available at

256 <https://www.cbioportal.org/>.

257

258 **Financial & competing interests disclosure**

259 The research for this paper was funded by Bristol Myers Squibb. Rafael Aldana and  
260 Zhipan Li are employees of Sentieon, Inc. Sjoerd van Hagen and Sander Y.A. Rodenburg are  
261 employees of The Hyve. Xiaozhong Qian is an employee of Daichi Sankyo, Inc. The other  
262 authors have no conflicts of interest to declare. No writing assistance was utilized in the  
263 production of this manuscript.

264

265 **Author contributions**

266 SS and NK identified, processed and analyzed the datasets, and wrote the manuscript.

267 SK identified the problem presented in the manuscript and SK, SS and NK conceived the

268 idea. RA and ZL developed the scripts and code. SH and SR helped with data retrieval and  
269 analysis from cBioPortal. MWR, AS, HT and XQ contributed to the analysis of the results and  
270 downstream implications. All authors discussed results and contributed to the final  
271 manuscript.

272

## 273 **Acknowledgements**

274 The results shown here are in whole or part based upon data generated by the TCGA  
275 Research Network: <https://www.cancer.gov/tcga>.

276

## 277 **Ethical conduct of research**

278 The authors state that they have obtained appropriate institutional review board  
279 approval or have followed the principles outlined in the Declaration of Helsinki for all human  
280 or animal experimental investigations. In addition, for investigations involving human  
281 subjects, informed consent has been obtained from the participants involved.

282

## 283 **Bibliography**

284

- 285 1. Ding, L., Wendl, M. C., McMichael, J. F. & Raphael, B. J. Expanding the computational  
286 toolbox for mining cancer genomes. *Nat. Rev. Genet.* **15**, 556–570 (2014).
- 287 2. Benjamin, D. *et al.* Calling Somatic SNVs and Indels with Mutect2. *bioRxiv* 861054 (2019)  
288 doi:10.1101/861054.
- 289 3. Koboldt, D. C. *et al.* VarScan 2: somatic mutation and copy number alteration discovery in  
290 cancer by exome sequencing. *Genome Res.* **22**, 568–576 (2012).

- 291 4. Lai, Z. *et al.* VarDict: a novel and versatile variant caller for next-generation sequencing in  
292 cancer research. *Nucleic Acids Res.* **44**, e108 (2016).
- 293 5. Kim, S. *et al.* Strelka2: Fast and accurate variant calling for clinical sequencing  
294 applications. *bioRxiv* 192872 (2017) doi:10.1101/192872.
- 295 6. Freed, D., Pan, R. & Aldana, R. TNscope: Accurate Detection of Somatic Mutations with  
296 Haplotype-based Variant Candidate Detection and Machine Learning Filtering. *bioRxiv*  
297 250647 (2018) doi:10.1101/250647.
- 298 7. Cingolani, P. *et al.* A program for annotating and predicting the effects of single  
299 nucleotide polymorphisms, SnpEff: SNPs in the genome of *Drosophila melanogaster*  
300 strain w<sup>1118</sup>; iso-2; iso-3. *Fly (Austin)* **6**, 80–92 (2012).
- 301 8. Wang, K., Li, M. & Hakonarson, H. ANNOVAR: functional annotation of genetic variants  
302 from high-throughput sequencing data. *Nucleic Acids Res.* **38**, e164 (2010).
- 303 9. McLaren, W. *et al.* The Ensembl Variant Effect Predictor. *Genome Biol.* **17**, 122 (2016).
- 304 10. Danecek, P. & McCarthy, S. A. BCFtools/csq: haplotype-aware variant consequences.  
305 *Bioinforma. Oxf. Engl.* **33**, 2037–2039 (2017).
- 306 11. Wei, L. *et al.* MAC: identifying and correcting annotation for multi-nucleotide variations.  
307 *BMC Genomics* **16**, (2015).
- 308 12. Khan, W. *et al.* MACARON: a python framework to identify and re-annotate multi-base  
309 affected codons in whole genome/exome sequence data. *Bioinforma. Oxf. Engl.* **34**,  
310 3396–3398 (2018).
- 311 13. Lee, C.-H., Yelensky, R., Jooss, K. & Chan, T. A. Update on Tumor Neoantigens and Their  
312 Utility: Why It Is Good to Be Different. *Trends Immunol.* **39**, 536–548 (2018).

- 313 14. Gao, J. *et al.* Integrative analysis of complex cancer genomics and clinical profiles using  
314 the cBioPortal. *Sci. Signal.* **6**, pl1 (2013).
- 315 15. Cerami, E. *et al.* The cBio cancer genomics portal: an open platform for exploring  
316 multidimensional cancer genomics data. *Cancer Discov.* **2**, 401–404 (2012).
- 317 16. Alexandrov, L. B. & Stratton, M. R. Mutational signatures: the patterns of somatic  
318 mutations hidden in cancer genomes. *Curr. Opin. Genet. Dev.* **24**, 52–60 (2014).
- 319 17. Alexandrov, L. B. *et al.* The repertoire of mutational signatures in human cancer. *Nature*  
320 **578**, 94–101 (2020).
- 321 18. Fisher, K. E. *et al.* Accurate detection of BRAF p.V600E mutations in challenging  
322 melanoma specimens requires stringent immunohistochemistry scoring criteria or  
323 sensitive molecular assays. *Hum. Pathol.* **45**, 2281–2293 (2014).
- 324 19. Lee, S. H. *et al.* BRAF and KRAS mutations in stomach cancer. *Oncogene* **22**, 6942–6945  
325 (2003).
- 326 20. Siroy, A. E. *et al.* Beyond BRAF(V600): clinical mutation panel testing by next-generation  
327 sequencing in advanced melanoma. *J. Invest. Dermatol.* **135**, 508–515 (2015).
- 328 21. Santarpia, L. *et al.* Mutation profiling identifies numerous rare drug targets and distinct  
329 mutation patterns in different clinical subtypes of breast cancers. *Breast Cancer Res.*  
330 *Treat.* **134**, 333–343 (2012).
- 331 22. Liu, S. *et al.* Rapid detection of genetic mutations in individual breast cancer patients by  
332 next-generation DNA sequencing. *Hum. Genomics* **9**, (2015).
- 333 23. RAS/RAF pathway activation in gliomas: the result of copy number gains rather than  
334 activating mutations. - Abstract - Europe PMC.  
335 <https://europepmc.org/article/med/17588166>.

- 336 24. Chan, T. L., Zhao, W., Leung, S. Y., Yuen, S. T. & Cancer Genome Project. BRAF and KRAS  
337 mutations in colorectal hyperplastic polyps and serrated adenomas. *Cancer Res.* **63**,  
338 4878–4881 (2003).
- 339 25. Lovly, C. M. *et al.* Routine multiplex mutational profiling of melanomas enables  
340 enrollment in genotype-driven therapeutic trials. *PLoS One* **7**, e35309 (2012).
- 341 26. Litvak, A. M. *et al.* Clinical characteristics and course of 63 patients with BRAF mutant  
342 lung cancers. *J. Thorac. Oncol. Off. Publ. Int. Assoc. Study Lung Cancer* **9**, 1669–1674  
343 (2014).
- 344 27. Parakh, S., Murphy, C., Lau, D., Cebon, J. S. & Andrews, M. C. Response to MAPK  
345 pathway inhibitors in BRAF V600M-mutated metastatic melanoma. *J. Clin. Pharm. Ther.*  
346 **40**, 121–123 (2015).
- 347 28. Popescu, A., Haidar, A. & Anghel, R. M. Treating malignant melanoma when a rare BRAF  
348 V600M mutation is present: case report and literature review. *Romanian J. Intern. Med.*  
349 *Rev. Roum. Med. Interne* **56**, 122–126 (2018).
- 350 29. Ponti, G., Tomasi, A. & Pellacani, G. Overwhelming response to Dabrafenib in a patient  
351 with double BRAF mutation (V600E; V600M) metastatic malignant melanoma. *J. Hematol.*  
352 *Oncol. J Hematol Oncol* **5**, 60 (2012).
- 353 30. Ponti, G. *et al.* The somatic affairs of BRAF: tailored therapies for advanced malignant  
354 melanoma and orphan non-V600E (V600R-M) mutations. *J. Clin. Pathol.* **66**, 441–445  
355 (2013).
- 356 31. FDA Approves Dabrafenib Plus Trametinib for Adjuvant Treatment of Melanoma With  
357 **BRAF** V600E or V600K Mutations - The ASCO Post.



- 358 [https://www.ascopost.com/News/58790?utm\\_source=TrendMD&utm\\_medium=cpc&utm\\_campaign=Skin\\_Cancer\\_TrendMD\\_0](https://www.ascopost.com/News/58790?utm_source=TrendMD&utm_medium=cpc&utm_campaign=Skin_Cancer_TrendMD_0).
- 359
- 360 32. FDA Grants Regular Approval to Dabrafenib and Trametinib Combination for Metastatic
- 361 NSCLC With *BRAF* V600E Mutation - The ASCO Post.
- 362 [https://www.ascopost.com/News/57776?utm\\_source=TrendMD&utm\\_medium=cpc&utm\\_campaign=Lung\\_Cancer\\_TrendMD\\_0](https://www.ascopost.com/News/57776?utm_source=TrendMD&utm_medium=cpc&utm_campaign=Lung_Cancer_TrendMD_0).
- 363
- 364 33. Kiel, C., Benisty, H., Lloréns-Rico, V. & Serrano, L. The yin–yang of kinase activation and
- 365 unfolding explains the peculiarity of Val600 in the activation segment of BRAF. *eLife* **5**,
- 366 e12814 (2016).
- 367 34. Li, Y., Umbach, D. M. & Li, L. Putative genomic characteristics of BRAF V600K versus
- 368 V600E cutaneous melanoma. *Melanoma Res.* **27**, 527–535 (2017).
- 369 35. Pires da Silva, I. *et al.* Distinct Molecular Profiles and Immunotherapy Treatment
- 370 Outcomes of V600E and V600K BRAF-Mutant Melanoma. *Clin. Cancer Res. Off. J. Am.*
- 371 *Assoc. Cancer Res.* **25**, 1272–1279 (2019).
- 372 36. Brash, D. E. UV Signature Mutations. *Photochem. Photobiol.* **91**, 15–26 (2015).
- 373 37. Kaplanis, J. *et al.* Exome-wide assessment of the functional impact and pathogenicity of
- 374 multinucleotide mutations. *Genome Res.* **29**, 1047–1056 (2019).
- 375 38. Wang, Q. *et al.* Landscape of multi-nucleotide variants in 125,748 human exomes and
- 376 15,708 genomes. *bioRxiv* 573378 (2019) doi:10.1101/573378.
- 377 39. Koire, A. *et al.* Codon-level co-occurrences of germline variants and somatic mutations in
- 378 cancer are rare but often lead to incorrect variant annotation and underestimated impact
- 379 prediction. *PLoS ONE* **12**, (2017).
- 380 40. Pan-cancer analysis of whole genomes. *Nature* **578**, 82–93 (2020).

- 381 41. Consortium, T. A. P. G. AACR Project GENIE: Powering Precision Medicine through an  
382 International Consortium. *Cancer Discov.* (2017) doi:10.1158/2159-8290.CD-17-0151.
- 383 42. Karczewski, K. J. *et al.* Variation across 141,456 human exomes and genomes reveals the  
384 spectrum of loss-of-function intolerance across human protein-coding genes. *bioRxiv*  
385 531210 (2019) doi:10.1101/531210.
- 386 43. Sherry, S. T. *et al.* dbSNP: the NCBI database of genetic variation. *Nucleic Acids Res.* **29**,  
387 308–311 (2001).
- 388 44. Tate, J. G. *et al.* COSMIC: the Catalogue Of Somatic Mutations In Cancer. *Nucleic Acids*  
389 *Res.* **47**, D941–D947 (2019).

390

### 391 **Figures and Tables legends**

392 **Fig. 1:** Schematic presentation of MNV and SNV events. (a) Two SNVs co-occurring on the  
393 same read indicate they are part of the same haplotype and should be annotated as MNV.  
394 (b) Two adjacent SNVs are on different reads and should be annotated as individual SNVs.

395

396 **Fig. 2:** Novel MNV effects in TCGA data. (a) Categories and examples of the MNV novel  
397 annotation effects as a result of combination of two SNVs. (b) Number of MNVs for novel  
398 effects in TCGA data.

399

400 **Fig. 3:** MNV summary in TCGA dataset. (a) Distribution of TCGA samples by indication. The  
401 bars indicate the percent of samples that had MNV(s). (b) Boxplot of the SNV count per  
402 indication. (c) Boxplot of the MNV count per indication. Indications are ordered the same as  
403 the SNV count. (d) Distribution of novel and original MNV for genes with total MNV  $\geq 10$ .

404

405 **Fig. 4:** Variant allele frequencies of variants present on the same codon in cBioPortal. The  
406 high correlation between the VAs of the variants indicates that they were present on the  
407 same reads.

408

409 **Fig. 5:** Double-base mutation patterns found in the TCGA data based on the MNV  
410 corrections. (a) Frequency of double-base mutation patterns found in all indications of TCGA  
411 results. The reverse complement was accounted according to the double-base signatures  
412 described in Alexandrov et al, 2020. (b) Double-base mutation patterns plotted for the  
413 selected indications: melanoma and lung carcinoma. Lung adenocarcinoma (LUAD) and lung  
414 squamous cell carcinoma (LUSC) were combined into one panel for lung carcinoma.

415

416 **Table 1:** Most commonly mis-annotated MNVs in cBioPortal among the 7 genes that were  
417 studied

418

419 **Supplementary Table 1:** Table of all samples from cBioPortal that have a variant at the BRAF  
420 V600 and G469, KRAS G12 and NRAS Q61 loci. The common samples that have conflicting  
421 annotations between studies are indicated by separating with a ";"

**A**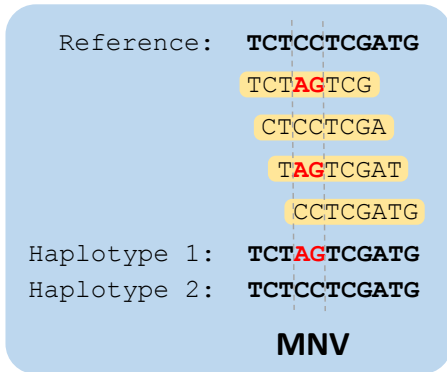**B**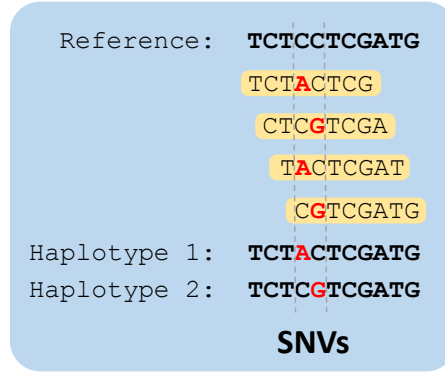

**Figure 1: Schematic presentation of MNV and SNV events.** (A) The 2 SNVs co-occurring on the same reads indicates they are part of the same haplotype and should be annotated as MNV. (B) The 2 SNVs in this case are adjacent but on different reads, and should be annotated as individual SNVs.

| Gene | SNVs          | MNV   | Count |
|------|---------------|-------|-------|
| BRAF | V600M + V600E | V600K | 52    |
| BRAF | V600M + V600G | V600R | 9     |
| BRAF | G469V + G469* | G469L | 2     |
| KRAS | G12V + G12C   | G12F  | 8     |
| KRAS | G12A + G12C   | G12S  | 2     |
| KRAS | G12V + G12S   | G12I  | 2     |
| KRAS | G12V + G12R   | G12L  | 2     |
| NRAS | Q61R + Q61K   | Q61R  | 5     |

**Table 1: Most commonly mis-annotated MNVs in cBioPortal among the 7 genes that were studied**

A

| Category           | SNVs effects            | MNV effect |
|--------------------|-------------------------|------------|
| Novel missense     | missense A, missense B  | missense C |
| Rescue of nonsense | stop gained, missense A | missense B |
| Gain of nonsense   | missense A, missense B  | stop gain  |
| Novel splice       | splice A, splice B      | splice C   |
| Rescue of missense | missense A, missense B  | synonymous |
| Other              | stop lost, missense A   | missense B |

B

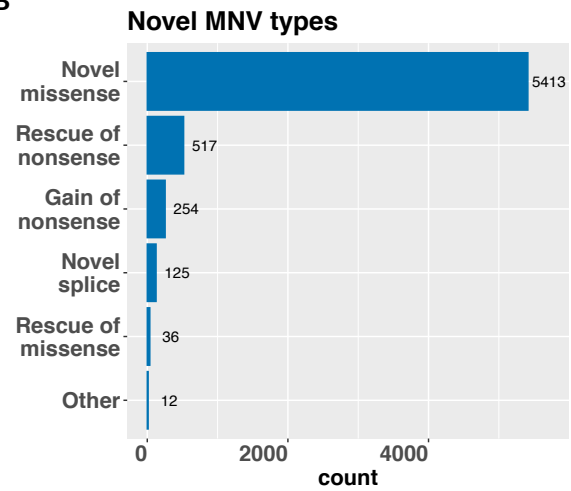

**Figure 2: Novel MNV effects in TCGA data.** (A) Categories and examples of the MNV novel annotation effect as a result of combination of two SNVs. (B) Number of MNVs for novel effects in TCGA data.

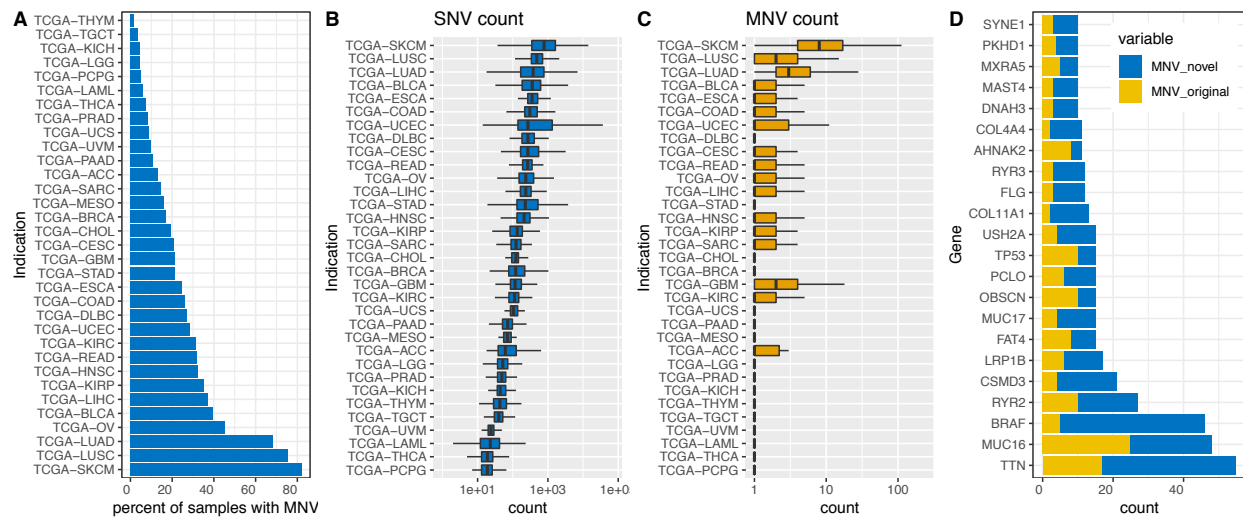

**Figure 3: MNV summary in TCGA dataset.** (A) Distribution of TCGA samples by indication. The bars indicate the percent of samples that had MNV(s). (B) Boxplot of the SNV count per indication. (C) Boxplot of the MNV count per indication. Indications are ordered the same as the SNV count. (D) Distribution of novel and original MNV for genes with total MNV  $\geq 10$ .

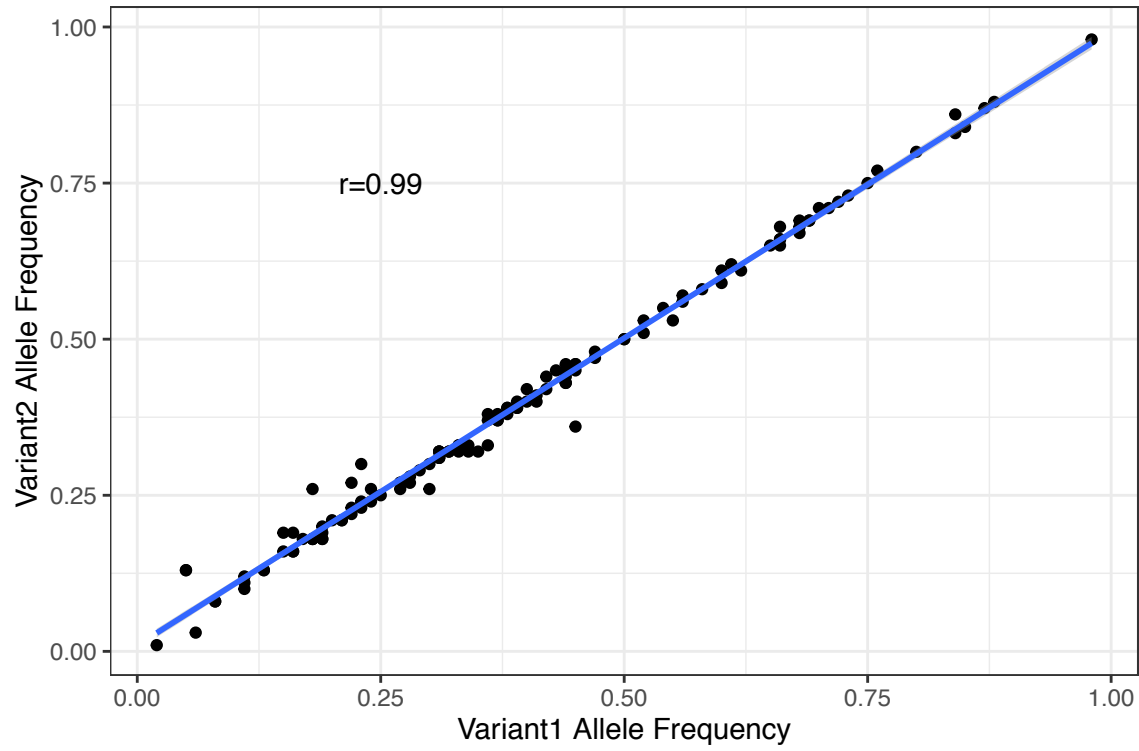

**Figure 4: Variant allele frequencies of variants present on the same codon in cBioPortal. The high correlation between the VAFs of the variants indicates that they were present on the same reads.**



**A**

**Double-base mutation patterns in TCGA results**

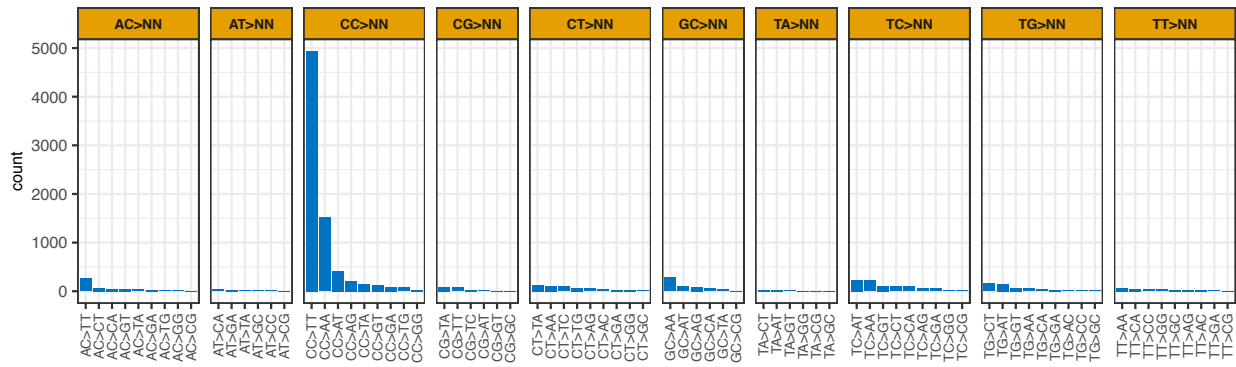

**B**

**Double-base mutation patterns for the selected indications**

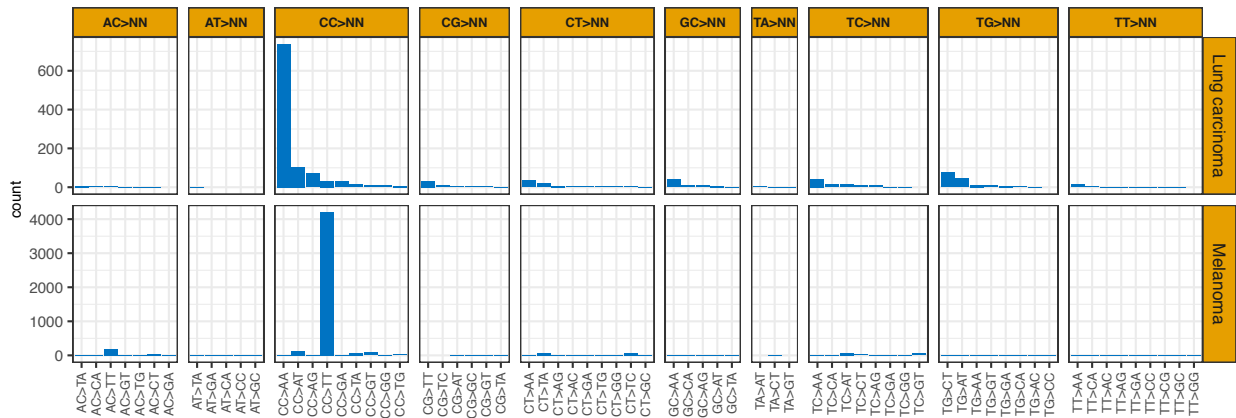

**Figure 5: Double-base mutation patterns found in the TCGA data based on the MNV corrections. (A)** Frequency of double-base mutation patterns found in all indications of TCGA results. The reverse complement was accounted according to the double-base signatures described in Alexandrov et al, 2020. **(B)** Double-base mutation patterns plotted for the selected indications: melanoma and lung carcinoma. Lung adenocarcinoma (LUAD) and lung squamous cell carcinoma (LUSC) were combined into one panel for lung carcinoma.
